# Supplementary material
Source: PubMed Central journal article supplement (PMC8804973)
Supplement: jamaneurol-e215181-s001.pdf [file jamaneurol-e215181-s001.pdf]

## Supplemental Online Content

Lim YY, Maruff P, Barthélemy NR, et al; Dominantly Inherited Alzheimer Network. Association of *BDNF* Val66Met with tau hyperphosphorylation and cognition in dominantly inherited Alzheimer disease. *JAMA Neurol*. Published online January 31, 2022. doi:10.1001/jamaneurol.2021.5181

### **eMethods.**

**eTable 1.** Demographic, Clinical, and Biological Characteristics of the ADNI Preclinical Sporadic AD Sample

**eTable 2.** Effect of *BDNF* Val66Met on Baseline Episodic Memory, and Levels of CSF Total Tau and CSF p-Tau181 in Preclinical Sporadic AD

**eTable 3.** Effect of Clinical Group and EYO on Cognitive Outcomes, Site-Specific Tau Phosphorylation Occupancies, and MS Total Tau Levels

**eTable 4.** Effect of Clinical Group and EYO on Each Cognitive and Biomarker Outcome in *PS1* Mutation Carriers

This supplemental material has been provided by the authors to give readers additional information about their work.

## eMethods

Each thawed CSF sample was mixed with 25  $\mu$ l of a solution containing 15N-441 tau internal standard (2.5 ng per sample), 50 mM guanidine, 10% NP-40 and 10 $\times$ protease inhibitor cocktail (Roche). Tau was extracted by immune capture using incubation under rotation at room temperature for 2 h with 20  $\mu$ l of Sepharose beads cross-linked to Tau-1 (tau epitope 192–199) and HJ8.5 (tau epitope 27–35) antibodies. Beads were spun by centrifugation, then rinsed three times with 1 ml of 25 mM triethylammonium bicarbonate. Samples were digested overnight at 37°C with 400 ng of trypsin Gold (Promega). AQUA peptides (Life Technologies) were spiked to obtain an amount of 5 fmol per labeled phosphorylated peptide and 50 fmol per labeled unmodified peptide in each sample. The peptide mixture was loaded on TopTip C18 tips, washed with 0.1% formic acid solution and eluted with 60% acetonitrile/0.1% formic acid solution. Eluates were dried using a Speedvac and dried samples were stored at –80 °C before analysis. Samples were resuspended in 25  $\mu$ l of 2% acetonitrile/0.1% formic acid. Extracts were analyzed by nano liquid chromatography coupled to high-resolution tandem mass spectrometry (HRMS/MS) using parallel reaction monitoring using HCD fragmentation. Nano liquid chromatography–HRMS/MS experiments were performed using a nanoAcquity UPLC system (Waters) coupled to a Fusion Tribrid mass spectrometer (Thermo Fisher Scientific). For each sample, 5  $\mu$ l was injected. Peptide separation was achieved at 60 °C in 24 min on a Waters HSS T3 column (75  $\mu$ m  $\times$  100 mm; 1.8  $\mu$ m). Mobile phases were: (A) 0.1% formic acid in water; and (B) 0.1% formic acid in acetonitrile. The gradient used was 0.5% B at 0 min, 5% B at 7.5 min and 18% B at 22 min, then the column was rinsed for 2 min with 95% B. The flow rate was set at 700 nl/min for 7.5 min, then 400 nl/min for the rest of the analysis. Data were acquired in the positive ion mode at a spray voltage of 2,200 V (Nanospray Flex ion source; Thermo Fisher Scientific) and the ion transfer tube was set at 270 °C. The S-lens radio frequency voltage was set at 60 V. HRMS/MS transitions were extracted using Skyline software (MacCoss laboratory). CSF tau phosphorylation levels were calculated using measured ratios between HRMS/MS transitions of endogenous unphosphorylated peptides and 15N-labeled peptides from the protein internal standard. Ptau/tau ratios defining site phosphorylation occupancy on T181, T217, and T205 were measured using the ratio of the HRMS/MS transitions from phosphorylated peptides and the corresponding unphosphorylated peptides. Each phosphorylated/unphosphorylated peptide endogenous ratio was normalized using the ratio measured on the HRMS/MS transitions of the corresponding AQUA phosphorylated/unphosphorylated peptide internal standards.

**eTable 1. Demographic, clinical and biological characteristics of the ADNI preclinical sporadic AD sample.**

|                              | CN Val66 homozygotes<br>(n=87) | CN Met66 carriers<br>(n=38) |          |
|------------------------------|--------------------------------|-----------------------------|----------|
|                              | N (%)                          | N (%)                       | <i>p</i> |
| Female                       | 46 (52.9%)                     | 19 (50.0%)                  | .767     |
| <i>APOE</i> ε4               | 31 (35.6%)                     | 20 (52.6%)                  | .075     |
|                              | Mean (SD)                      | Mean (SD)                   | <i>p</i> |
| Age                          | 74.73 (5.21)                   | 74.98 (6.46)                | .822     |
| Education                    | 16.24 (2.67)                   | 16.32 (2.09)                | .879     |
| MMSE                         | 29.13 (1.08)                   | 29.11 (1.13)                | .921     |
| CDR Total                    | 0.00 (0.00)                    | 0.00 (0.00)                 | .999     |
| GDS                          | 0.76 (0.93)                    | 0.89 (1.31)                 | .509     |
| CSF Aβ <sub>42</sub> (pg/ml) | 759.26 (199.68)                | 713.62 (209.24)             | .249     |

\*Note: CN = cognitively normal; APOE = apolipoprotein E; MMSE = Mini Mental State Examination; CDR = Clinical Dementia Rating; GDS = Geriatric Depression Scale; CSF = cerebrospinal fluid; Aβ<sub>42</sub> = Aβ<sub>42</sub> levels measured using immunoassay

**eTable 2. Effect of *BDNF* Val66Met on baseline episodic memory, and levels of CSF total tau and CSF ptau<sub>181</sub> in preclinical sporadic AD (i.e., Aβ+ cognitively normal older adults).**

|                              | Episodic Memory |          | CSF total tau  |          | CSF ptau181    |          |
|------------------------------|-----------------|----------|----------------|----------|----------------|----------|
|                              | (df) F          | <i>p</i> | (df) F         | <i>p</i> | (df) F         | <i>p</i> |
| BDNF Group                   | (1,120) 3.845   | .050     | (1,120) 9.653  | .002     | (1,120) 9.893  | .002     |
| APOE ε4                      | (1,120) 0.905   | .343     | (1,120) 12.554 | .001     | (1,120) 13.368 | .001     |
| Sex                          | (1,120) 10.837  | .001     | (1,120) 0.840  | .361     | (1,120) 0.775  | .380     |
| Age                          | (1,120) 7.875   | .006     | (1,120) 10.589 | .001     | (1,120) 10.098 | .002     |
|                              | Mean (SD)       |          | Mean (SD)      |          | Mean (SD)      |          |
| Aβ+ Val66 homozygotes (n=87) | 0.995 (0.476)   |          | 229 (93.274)   |          | 22.10 (10.260) |          |
| Aβ+ Met66 carriers (n=38)    | 0.814 (0.456)   |          | 271 (90.617)   |          | 26.80 (9.925)  |          |

\*Note: Means have been adjusted for age, sex and ε4.

**eTable 3. Effect of clinical group and EYO on cognitive outcomes, site-specific tau phosphorylation occupancies and MS t-tau levels**

|                                                                                          | Group                    |                        | EYO                       |                       | Group x EYO              |                       |
|------------------------------------------------------------------------------------------|--------------------------|------------------------|---------------------------|-----------------------|--------------------------|-----------------------|
|                                                                                          | (df) F                   | <i>p</i>               | (df) F                    | <i>p</i>              | (df) F                   | <i>p</i>              |
| Episodic Memory                                                                          | (4,306)<br>60.915        | 2.20x10 <sup>-16</sup> | (1,306)<br>14.852         | 1.42x10 <sup>-4</sup> | (4,306)<br>1.847         | .120                  |
| Global Cognition                                                                         | (4,308)<br>57.466        | 2.20x10 <sup>-16</sup> | (1,308)<br>9.512          | 2.22x10 <sup>-3</sup> | (4,308)<br>4.274         | 2.22x10 <sup>-3</sup> |
| Hippocampal Volume                                                                       | (4,310)<br>41.601        | 2.20x10 <sup>-16</sup> | (1,310)<br>25.771         | 6.64x10 <sup>-7</sup> | (4,310)<br>5.806         | 1.62x10 <sup>-4</sup> |
| pT217/T217 (%)                                                                           | (4,310)<br>127.374       | 2.20x10 <sup>-16</sup> | (1,310)<br>37.160         | 3.23x10 <sup>-9</sup> | (4,310)<br>10.981        | 2.43x10 <sup>-8</sup> |
| pT181/T181 (%)                                                                           | (4,310)<br>69.576        | 2.20x10 <sup>-16</sup> | (1,310)<br>21.965         | 4.16x10 <sup>-7</sup> | (4,310)<br>7.017         | 2.03x10 <sup>-8</sup> |
| pT205/T205 (%)                                                                           | (4,310)<br>104.617       | 2.20x10 <sup>-16</sup> | (1,310)<br>30.928         | 5.79x10 <sup>-8</sup> | (4,310)<br>8.527         | 1.54x10 <sup>-6</sup> |
| MS t-tau (T181, ng/ml)                                                                   | (4,310)<br>41.006        | 2.20x10 <sup>-16</sup> | (1,310)<br>20.581         | 8.18x10 <sup>-6</sup> | (4,310)<br>3.858         | .004                  |
| <b>Estimated Marginal Means (SE)</b>                                                     |                          |                        |                           |                       |                          |                       |
|                                                                                          | NC                       | pMC Val66              | pMC Met66                 | sMC Val66             | sMC Met66                |                       |
| Episodic Memory                                                                          | -0.090 (0.078)           | -0.036 (0.092)         | -0.589 (0.126)            | -1.220 (0.291)        | -1.892 (0.491)           |                       |
| Global Cognition                                                                         | -0.350 (0.147)           | -0.090 (0.162)         | -0.288 (0.221)            | -2.056 (0.290)        | -3.383 (0.400)           |                       |
| Hippocampal Volume                                                                       | 8.76 (0.079)             | 8.95 (0.093)           | 8.61 (0.127)              | 8.97 (0.295)          | 8.29 (0.497)             |                       |
| pT217/T217 (%)                                                                           | 1.78 (0.215)             | 3.24 (0.254)           | 4.85 (0.346)              | 4.66 (0.801)          | 7.18 (1.350)             |                       |
| pT181/T181 (%)                                                                           | 22.60 (0.524)            | 25.90 (0.619)          | 29.80 (0.841)             | 29.80 (1.952)         | 29.90 (3.284)            |                       |
| pT205/T205 (%)                                                                           | 0.380 (0.019)            | 0.502 (0.023)          | 0.481 (0.031)             | 0.747 (0.071)         | 1.206 (0.120)            |                       |
| MS t-tau (T181, ng/ml)                                                                   | 0.434 (0.022)            | 0.471 (0.026)          | 0.584 (0.035)             | 0.495 (0.082)         | 0.957 (0.138)            |                       |
| <b>Effect size of difference between selected groups of interest, Cohen's d (95% CI)</b> |                          |                        |                           |                       |                          |                       |
|                                                                                          | NC vs. pMC Val66         |                        | pMC Val66 vs. pMC Met66   |                       | sMC Val66 vs. sMC Met66  |                       |
| Episodic Memory                                                                          | 0.06 (-0.20, 0.31)       |                        | <b>0.60 (0.26, 0.93)</b>  |                       | 0.30 (-0.17, 0.77)       |                       |
| Global Cognition                                                                         | 0.15 (-0.10, 0.41)       |                        | 0.12 (-0.21, 0.45)        |                       | <b>0.66 (0.17, 1.13)</b> |                       |
| Hippocampal Volume                                                                       | 0.20 (-0.05, 0.46)       |                        | <b>0.36 (0.03, 0.69)</b>  |                       | 0.30 (-0.17, 0.77)       |                       |
| pT217/T217 (%)                                                                           | <b>0.57 (0.31, 0.83)</b> |                        | <b>0.63 (0.29, 0.96)</b>  |                       | 0.41 (-0.07, 0.88)       |                       |
| pT181/T181 (%)                                                                           | <b>0.53 (0.27, 0.79)</b> |                        | <b>0.63 (-0.29, 0.96)</b> |                       | 0.01 (-0.46, 0.48)       |                       |
| pT205/T205 (%)                                                                           | <b>0.53 (0.27, 0.79)</b> |                        | 0.09 (-0.24, 0.42)        |                       | <b>0.84 (0.35, 1.32)</b> |                       |
| MS t-tau (T181, ng/ml)                                                                   | 0.14 (-0.11, 0.40)       |                        | <b>0.43 (0.10, 0.76)</b>  |                       | <b>0.74 (0.24, 1.21)</b> |                       |

\*Note: bolded values indicate statistical significance at  $p < .05$ . Age, sex and PiB-PET SUVR were included as covariates. EYO = estimated year of symptom onset; EM = episodic memory composite; NC = non-mutation carriers; pMC = presymptomatic (CDR 0) mutation carrier; sMC = symptomatic (CDR 0.5+) mutation carrier

**eTable 4. Effect of clinical group and EYO on each cognitive and biomarker outcome in PS1 mutation carriers**

|                                                                                          | Group                    |                        | EYO                      |                       | Group x EYO              |                        |
|------------------------------------------------------------------------------------------|--------------------------|------------------------|--------------------------|-----------------------|--------------------------|------------------------|
|                                                                                          | (df) F                   | <i>p</i>               | (df) F                   | <i>p</i>              | (df) F                   | <i>p</i>               |
| Episodic Memory                                                                          | (4,250)<br>58.380        | 2.20x10 <sup>-16</sup> | (1,250)<br>12.688        | 4.41x10 <sup>-4</sup> | (4,250)<br>2.158         | .074                   |
| Global Cognition                                                                         | (4,253)<br>50.125        | 2.20x10 <sup>-16</sup> | (1,253)<br>6.803         | .009                  | (4,253)<br>6.742         | 3.60x10 <sup>-5</sup>  |
| Hippocampal Volume                                                                       | (4,233)<br>40.440        | 2.20x10 <sup>-16</sup> | (1,233)<br>21.071        | 7.24x10 <sup>-6</sup> | (4,233)<br>6.031         | 1.24x10 <sup>-4</sup>  |
| pT217/T217 (%)                                                                           | (4,254)<br>115.103       | 2.20x10 <sup>-16</sup> | (1,254)<br>26.813        | 4.56x10 <sup>-7</sup> | (4,254)<br>13.156        | 9.39x10 <sup>-10</sup> |
| pT181/T181 (%)                                                                           | (4,254)<br>68.890        | 2.20x10 <sup>-16</sup> | (1,254)<br>16.203        | 7.51x10 <sup>-5</sup> | (4,254)<br>9.295         | 5.03x10 <sup>-7</sup>  |
| pT205/T205 (%)                                                                           | (4,254)<br>107.595       | 2.20x10 <sup>-16</sup> | (1,254)<br>26.654        | 4.91x10 <sup>-7</sup> | (4,254)<br>8.680         | 1.40x10 <sup>-6</sup>  |
| MS t-tau (T181, ng/ml)                                                                   | (4,254)<br>34.922        | 2.20x10 <sup>-16</sup> | (1,254)<br>15.410        | 1.11x10 <sup>-4</sup> | (4,254)<br>3.213         | .013                   |
| <b>Estimated Marginal Means (SE)</b>                                                     |                          |                        |                          |                       |                          |                        |
|                                                                                          | NC (n=96)                | pMC Val66 (n=62)       | pMC Met66 (n=44)         | sMC Val66 (n=38)      | sMC Met66 (n=24)         |                        |
| Episodic Memory                                                                          | -0.015 (0.081)           | -0.158 (0.115)         | -0.622 (0.131)           | -1.290 (0.257)        | -1.655 (0.429)           |                        |
| Global Cognition                                                                         | -0.085 (0.203)           | -0.242 (0.258)         | -0.429 (0.301)           | -2.503 (0.343)        | -4.879 (0.425)           |                        |
| Hippocampal Volume                                                                       | 8.86 (0.086)             | 8.80 (0.121)           | 8.43 (0.138)             | 8.59 (0.290)          | 8.47 (0.502)             |                        |
| pT217/T217 (%)                                                                           | 1.20 (0.247)             | 4.44 (0.356)           | 5.49 (0.375)             | 6.73 (0.783)          | 7.65 (1.300)             |                        |
| pT181/T181 (%)                                                                           | 21.30 (0.575)            | 28.00 (0.829)          | 30.80 (0.943)            | 33.0 (1.825)          | 30.30 (3.031)            |                        |
| pT205/T205 (%)                                                                           | 0.325 (0.021)            | 0.537 (0.030)          | 0.516 (0.034)            | 0.792 (0.066)         | 1.031 (0.109)            |                        |
| MS t-tau (T181, ng/ml)                                                                   | 0.404 (0.025)            | 0.529 (0.035)          | 0.603 (0.040)            | 0.611 (0.078)         | 0.854 (0.130)            |                        |
| <b>Effect size of difference between selected groups of interest, Cohen's d (95% CI)</b> |                          |                        |                          |                       |                          |                        |
|                                                                                          | NC vs. pMC Val66         |                        | pMC Val66 vs. pMC Met66  |                       | sMC Val66 vs. sMC Met66  |                        |
| Episodic Memory                                                                          | 0.17 (-0.15, 0.49)       |                        | <b>0.52 (0.12, 0.91)</b> |                       | 0.20 (-0.31, 0.71)       |                        |
| Global Cognition                                                                         | 0.08 (-0.24, 0.40)       |                        | 0.09 (-0.29, 0.48)       |                       | <b>1.13 (0.57, 1.66)</b> |                        |
| Hippocampal Volume                                                                       | 0.07 (-0.25, 0.39)       |                        | <b>0.39 (0.00, 0.78)</b> |                       | 0.06 (-0.45, 0.57)       |                        |
| pT217/T217 (%)                                                                           | <b>1.26 (0.90, 1.60)</b> |                        | <b>0.39 (0.00, 0.78)</b> |                       | 0.17 (-0.35, 0.68)       |                        |
| pT181/T181 (%)                                                                           | <b>1.12 (0.77, 1.45)</b> |                        | <b>0.44 (0.04, 0.82)</b> |                       | 0.21 (-0.30, 0.72)       |                        |
| pT205/T205 (%)                                                                           | <b>0.97 (0.63, 1.30)</b> |                        | 0.09 (-0.30, 0.48)       |                       | <b>0.52 (0.00, 1.03)</b> |                        |

|                           |                          |                    |                    |
|---------------------------|--------------------------|--------------------|--------------------|
| MS t-tau (T181,<br>ng/ml) | <b>0.49 (0.16, 0.81)</b> | 0.27 (-0.12, 0.66) | 0.45 (-0.08, 0.96) |
|---------------------------|--------------------------|--------------------|--------------------|

\* Note: bolded values indicate statistical significance at  $p < .05$ . EYO = estimated year of symptom onset; EM = episodic memory composite; NC = non-mutation carriers; pMC = presymptomatic (CDR 0) mutation carrier; sMC = symptomatic (CDR 0.5+) mutation carrier
