# Supplementary material
Source: PubMed Central journal article supplement (PMC8804973)
Supplement: jamaneurol-e215181-s002.pdf [file jamaneurol-e215181-s002.pdf]

\*Indicates required information. Only first name, last name, and suffix will appear in PubMed.

| <b>*Group Name(s): Dominantly Inherited Alzheimer Network (DIAN)</b> |                   |                              |                         |                                                               |                                                 |                                                                |                                                                                                   |
|----------------------------------------------------------------------|-------------------|------------------------------|-------------------------|---------------------------------------------------------------|-------------------------------------------------|----------------------------------------------------------------|---------------------------------------------------------------------------------------------------|
| <b>*First Name and Middle Initial(s)</b>                             | <b>*Last Name</b> | <b>*Suffix (eg, Jr, III)</b> | <b>Academic Degrees</b> | <b>Institution</b>                                            | <b>Location (city, state/province, country)</b> | <b>Role or Contribution, eg, chair, principal investigator</b> | <b>Group (if more than 1 Group listed in the byline and/or Subgroup (eg, Steering Committee))</b> |
| Jasmeer                                                              | Chhatwal          |                              | MD,PhD                  | Brigham and Women's Hospital–Massachusetts General Hospital   | Boston, MA, USA                                 | Site PI                                                        |                                                                                                   |
| Colleen                                                              | Fitzpatrick       |                              | MS                      | Brigham and Women's Hospital–Massachusetts                    | Boston, MA, USA                                 | Site Coordinator                                               |                                                                                                   |
| Courtney                                                             | Bodge             |                              | PhD                     | Brown University–Butler Hospital                              | Providence, RI, USA                             | Site Coordinator                                               |                                                                                                   |
| Stephen                                                              | Salloway          |                              | MD                      | Brown University–Butler Hospital                              | Providence, RI, USA                             | Site PI                                                        |                                                                                                   |
| Christmary                                                           | De La Cruz        |                              |                         | Columbia University                                           | New York, NY, USA                               | Site Coordinator                                               |                                                                                                   |
| Jill                                                                 | Goldman           |                              | MS,MPhil, CGC           | Columbia University                                           | New York, NY, USA                               | Site Coordinator                                               |                                                                                                   |
| Arlene                                                               | Mejia             |                              | MD                      | Columbia University                                           | New York, NY, USA                               | Site Coordinator                                               |                                                                                                   |
| Katie                                                                | Neimeyer          |                              | MS                      | Columbia University                                           | New York, NY, USA                               | Site Coordinator                                               |                                                                                                   |
| James                                                                | Noble             |                              | MD                      | Columbia University                                           | New York, NY, USA                               | Site PI                                                        |                                                                                                   |
| Samantha                                                             | Gardener          |                              | PhD                     | Edith Cowan University                                        | Perth, WA, Australia                            | Site Coordinator                                               |                                                                                                   |
| Ralph                                                                | Martins           |                              | PhD                     | Edith Cowan University                                        | Perth, WA, Australia                            | Site PI                                                        |                                                                                                   |
| Hamid                                                                | Sohrabi           |                              | PhD                     | Edith Cowan University                                        | Perth, WA, Australia                            | Neuropsychologist                                              |                                                                                                   |
| Kevin                                                                | Taddei            |                              | BS                      | Edith Cowan University                                        | Perth, WA, Australia                            | Site Coordinator                                               |                                                                                                   |
| Kathleen                                                             | Carter            |                              | PhD                     | Emory University School of Medicine                           | Atlanta, GA, USA                                | Scientist                                                      |                                                                                                   |
| Duc                                                                  | Duong             |                              | BS                      | Emory University School of Medicine                           | Atlanta, GA, USA                                | Scientist                                                      |                                                                                                   |
| Erik                                                                 | Johnson           |                              | MD, PHD                 | Emory University School of Medicine                           | Atlanta, GA, USA                                | Co-Investigator                                                |                                                                                                   |
| Allan                                                                | Levey             |                              | MD, PHD                 | Emory University School of Medicine                           | Atlanta, GA, USA                                | Site Co-PI                                                     |                                                                                                   |
| Lingyan                                                              | Ping              |                              | PhD                     | Emory University School of Medicine                           | Atlanta, GA, USA                                | Scientist                                                      |                                                                                                   |
| Nick                                                                 | Seyfried          |                              | D.Phil                  | Emory University School of Medicine                           | Atlanta, GA, USA                                | Site Co-PI                                                     |                                                                                                   |
| Susanne                                                              | Gräber-Sultan     |                              | PhD                     | German Center for Neurodegenerative Diseases (DZNE)           | Tübingen, Germany                               | Neuropsychologist                                              |                                                                                                   |
| Lisa                                                                 | Häsler            |                              | MSc                     | German Center for Neurodegenerative Diseases (DZNE), Tübingen | Tübingen, Germany                               | Scientist                                                      |                                                                                                   |
| Anna                                                                 | Hofmann           |                              | MD                      | German Center for Neurodegenerative Diseases (DZNE), Tübingen | Tübingen, Germany                               | Research Clinician                                             |                                                                                                   |
| Mathias                                                              | Jucker            |                              | PhD                     | German Center for Neurodegenerative Diseases (DZNE), Tübingen | Tübingen, Germany                               | Site PI                                                        |                                                                                                   |
| Stephan                                                              | Käser             |                              | PHD                     | German Center for Neurodegenerative Diseases (DZNE), Tübingen | Tübingen, Germany                               | Scientist                                                      |                                                                                                   |
| Elke                                                                 | Kuder-Buletta     |                              | RN                      | German Center for Neurodegenerative Diseases (DZNE), Tübingen | Tübingen, Germany                               | Site Coordinator                                               |                                                                                                   |
| Christoph                                                            | Laske             |                              | PhD                     | German Center for Neurodegenerative Diseases (DZNE), Tübingen | Tübingen, Germany                               | Clinical Lead                                                  |                                                                                                   |
| Oliver                                                               | Preisiche         |                              | MD                      | German Center for Neurodegenerative Diseases (DZNE), Tübingen | Tübingen, Germany                               | Research Clinician                                             |                                                                                                   |
| Anna                                                                 | Diffenbacher      |                              | MS                      | German Center for Neurodegenerative Diseases (DZNE) Munich    | Munich, Germany                                 | Neuropsychologist                                              |                                                                                                   |
| Yakushev                                                             | Igor              |                              | MD                      | German Center for Neurodegenerative Diseases (DZNE) Munich    | Munich, Germany                                 | Imaging Scientist                                              |                                                                                                   |
| Johannes                                                             | Levin             |                              | MD                      | German Center for Neurodegenerative Diseases (DZNE) Munich    | Munich, Germany                                 | Site PI                                                        |                                                                                                   |
| Jonathan                                                             | Vöglein           |                              | MD                      | German Center for Neurodegenerative Diseases (DZNE) Munich    | Munich, Germany                                 | Study physician                                                |                                                                                                   |
| Ulricke                                                              | Obermüller        |                              |                         | Hertie Institute for Clinical Brain Research                  | Tübingen, Germany                               | Senior Lab Tech                                                |                                                                                                   |
| Bianca                                                               | Esposito          |                              | BS                      | Icahn School of Medicine at Mount Sinai                       | New York, NY, USA                               | Genetics Core Technician                                       |                                                                                                   |
| Alison                                                               | Goate             |                              | PhD                     | Icahn School of Medicine at Mount Sinai                       | New York, NY, USA                               | Genetics Core Co-Lead                                          |                                                                                                   |

\*Indicates required information. Only first name, last name, and suffix will appear in PubMed.

| *First Name and Middle Initial(s) | *Last Name        | *Suffix (eg, Jr, III) | Academic Degrees | Institution                              | Location (city, state/province, country) | Role or Contribution, eg, chair, principal investigator | Group (if more than 1 Group listed in the byline) and/or Subgroup (eg, Steering Committee) |
|-----------------------------------|-------------------|-----------------------|------------------|------------------------------------------|------------------------------------------|---------------------------------------------------------|--------------------------------------------------------------------------------------------|
| Alan                              | Renton            |                       | PhD              | Icahn School of Medicine at Mount Sinai  | New York, NY, USA                        | Genetics Core Scientist                                 |                                                                                            |
| Jared                             | Brosch            |                       | MD, PhD          | Indiana University                       | Indianapolis, IN, USA                    | Co-Investigator                                         |                                                                                            |
| Jill                              | Buck              |                       | BSN              | Indiana University                       | Indianapolis, IN, USA                    | Site Coordinator                                        |                                                                                            |
| Marty                             | Farlow            |                       | MD               | Indiana University                       | Indianapolis, IN, USA                    | Site PI                                                 |                                                                                            |
| Bernardino                        | Ghetti            |                       | MD               | Indiana University                       | Indianapolis, IN, USA                    | Scientist                                               |                                                                                            |
| Ricardo                           | Allegrì           |                       | PhD              | Institute of Neurological Research Fleni | Buenos Aires, Argentina                  | Site PI                                                 |                                                                                            |
| Patricio                          | Chrem             |                       |                  | Institute of Neurological Research Fleni | Buenos Aires, Argentina                  | Clinician                                               |                                                                                            |
| Noelia                            | Egido             |                       | BS               | Institute of Neurological Research Fleni | Buenos Aires, Argentina                  | Site Coordinator                                        |                                                                                            |
| Christian                         | Haass             |                       | PhD              | Ludwig-Maximilians University - Munich   | Munich, Germany                          | Site PI                                                 |                                                                                            |
| Estrella                          | Morenas-Rodriguez |                       | MD, PhD          | Ludwig-Maximilians University, Munich    | Munich, Germany                          | Clinician                                               |                                                                                            |
| Brigitte                          | Nuscher           |                       |                  | Ludwig-Maximilians University, Munich    | Munich, Germany                          | Site Coordinator                                        |                                                                                            |
| Gregory S                         | Day               |                       | MD               | Mayo Clinic Jacksonville                 | Jacksonville, FL, USA                    | Site Leader                                             |                                                                                            |
| Neill                             | Graff-Radford     |                       | MD               | Mayo Clinic Jacksonville                 | Jacksonville, FL, USA                    | Site PI                                                 |                                                                                            |
| Morgan                            | Graham            |                       | BA               | Mayo Clinic Jacksonville                 | Jacksonville, FL, USA                    | Site Coordinator                                        |                                                                                            |
| Sochenda                          | Stephens          |                       | BS, CCRP         | Mayo Clinic Jacksonville                 | Jacksonville, FL, USA                    | Site Coordinator                                        |                                                                                            |
| Clifford                          | Jack              |                       | MD               | Mayo Clinic Rochester                    | Rochester, MN, USA                       | Scientist                                               |                                                                                            |
| Jacob                             | Bechara           |                       | BS               | Neuroscience Research Australia          | Sydney, NSW, Australia                   | Site Coordinator                                        |                                                                                            |
| William (Bill)                    | Brooks            |                       | MBBS,MPH         | Neuroscience Research Australia          | Sydney, NSW, Australia                   | Clinician                                               |                                                                                            |
| Peter                             | Schofield         |                       | PhD              | Neuroscience Research Australia          | Sydney, NSW, Australia                   | Site PI                                                 |                                                                                            |
| Aki                               | Araki             |                       |                  | Niigata University                       | Niigata, Japan                           | Site Coordinator                                        |                                                                                            |
| Takeshi                           | Ikeuchi           |                       | MD               | Niigata University                       | Niigata, Japan                           | Scientist                                               |                                                                                            |
| Kensaku                           | Kasuga            |                       | MD               | Niigata University                       | Niigata, Japan                           | Site PI                                                 |                                                                                            |
| Kenji                             | Ishii             |                       | MD               | Niigata University/Tokyo University      | Niigata, Japan                           | Scientist                                               |                                                                                            |
| Hisako                            | Fujii             |                       | PhD              | Osaka City University                    | Osaka, Japan                             | Site Coordinator                                        |                                                                                            |
| Michio                            | Senda             |                       | MD, PhD          | Osaka City University                    | Osaka, Japan                             | Scientist                                               |                                                                                            |
| Hiroyuki                          | Shimada           |                       | MD, PhD          | Osaka City University                    | Osaka, Japan                             | Site PI                                                 |                                                                                            |
| Ryoko                             | Ihara             |                       | MD               | Tokyo University                         | Tokyo, Japan                             | Scientist                                               |                                                                                            |
| Akemi                             | Nagamatsu         |                       | RN               | Tokyo University                         | Tokyo, Japan                             | Scientist                                               |                                                                                            |
| Yoshiki                           | Niimi             |                       | MD               | Tokyo University                         | Tokyo, Japan                             | Site PI                                                 |                                                                                            |
| Jane                              | Douglas           |                       | MPH              | University College London                | London, UK                               | Site Coordinator                                        |                                                                                            |
| Nick                              | Fox               |                       | MD               | University College London                | London, UK                               | Site PI                                                 |                                                                                            |
| Miguel                            | Grilo             |                       | MD               | University College London                | London, UK                               | Site Coordinator                                        |                                                                                            |
| Cath                              | Mummery           |                       | PhD              | University College London                | London, UK                               | Co-Investigator                                         |                                                                                            |
| Antoinette                        | O'Connor          |                       | MRCPI            | University College London                | London, UK                               | Clinician                                               |                                                                                            |
| Colin                             | Masters           |                       | MD               | University of Melbourne                  | Melbourne, VIC, Australia                | Site PI                                                 |                                                                                            |
| Robert                            | Koeppe            |                       | PHD              | University of Michigan                   | Ann Arbor, MI, USA                       | PET QC                                                  |                                                                                            |
| Sarah                             | Berman            |                       | MD, PhD          | University of Pittsburgh                 | Pittsburgh, PA, USA                      | Site PI                                                 |                                                                                            |

\*Indicates required information. Only first name, last name, and suffix will appear in PubMed.

| *First Name and Middle Initial(s) | *Last Name | *Suffix (eg, Jr, III) | Academic Degrees | Institution                                           | Location (city, state/province, country) | Role or Contribution, eg, chair, principal investigator | Group (if more than 1 Group listed in the byline) and/or Subgroup (eg, Steering Committee) |
|-----------------------------------|------------|-----------------------|------------------|-------------------------------------------------------|------------------------------------------|---------------------------------------------------------|--------------------------------------------------------------------------------------------|
| Sarah                             | Goldberg   |                       | MS,LPC,N<br>CC   | University of Pittsburgh                              | Pittsburgh, PA, USA                      | Co-Investigator                                         |                                                                                            |
| Snezana                           | Ikonomovic |                       | MD               | University of Pittsburgh                              | Pittsburgh, PA, USA                      | Site Coordinator                                        |                                                                                            |
| William (Bill)                    | Klunk      |                       | MD, PHD          | University of Pittsburgh                              | Pittsburgh, PA, USA                      | Co-Investigator                                         |                                                                                            |
| Oscar                             | Lopez      |                       |                  | University of Pittsburgh                              | Pittsburgh, PA, USA                      | Co-Investigator                                         |                                                                                            |
| James                             | Mountz     |                       | MD               | University of Pittsburgh                              | Pittsburgh, PA, USA                      | Co-Investigator                                         |                                                                                            |
| Neelesh                           | Nadkarni   |                       | MD, PhD          | University of Pittsburgh                              | Pittsburgh, PA, USA                      | Co-Investigator                                         |                                                                                            |
| Riddhi                            | Patira     |                       |                  | University of Pittsburgh                              | Pittsburgh, PA, USA                      | Co-Investigator                                         |                                                                                            |
| Lori                              | Smith      |                       | PA-C             | University of Pittsburgh                              | Pittsburgh, PA, USA                      | Site Coordinator                                        |                                                                                            |
| Beth                              | Snitz      |                       | PhD              | University of Pittsburgh                              | Pittsburgh, PA, USA                      | Co-Investigator                                         |                                                                                            |
| Sarah                             | Thompson   |                       | PA-C             | University of Pittsburgh                              | Pittsburgh, PA, USA                      | Site Coordinator                                        |                                                                                            |
| Elise                             | Weamer     |                       | MPH              | University of Pittsburgh                              | Pittsburgh, PA, USA                      | Co-Investigator                                         |                                                                                            |
| Neal Scott                        | Mason      |                       | PhD              | University of Pittsburgh Medical Center               | Pittsburgh, PA, USA                      | Scientist                                               |                                                                                            |
| Helena                            | Chui       |                       | MD               | University of Southern California                     | Los Angeles, CA, USA                     | Site PI                                                 |                                                                                            |
| John                              | Ringman    |                       | MD               | University of Southern California                     | Los Angeles, CA, USA                     | Co-Investigator                                         |                                                                                            |
| Sarah                             | Adams      |                       | MS               | Washington University in St. Louis School of Medicine | St Louis, Missouri, USA                  | Clinical Core                                           |                                                                                            |
| Nicolas                           | Barthelemy |                       | PhD              | Washington University in St. Louis School of Medicine | St Louis, Missouri, USA                  | Fluid Biomarker Core<br>Scientist                       |                                                                                            |
| Randall                           | Bateman    |                       | MD               | Washington University in St. Louis School of Medicine | St Louis, Missouri, USA                  | DIAN Study PI                                           |                                                                                            |
| Tammie                            | Benzinger  |                       | MD, PhD          | Washington University in St. Louis School of Medicine | St Louis, Missouri, USA                  | Imaging Core Lead                                       |                                                                                            |
| Susan                             | Brandon    |                       | BS               | Washington University in St. Louis School of Medicine | St Louis, Missouri, USA                  | Admin Core                                              |                                                                                            |
| Virginia                          | Buckles    |                       | PhD              | Washington University in St. Louis School of Medicine | St Louis, Missouri, USA                  | Admin Core                                              |                                                                                            |
| Lisa                              | Cash       |                       | BFA              | Washington University in St. Louis School of Medicine | St Louis, Missouri, USA                  | Imaging Core<br>Coordinator                             |                                                                                            |
| Charlie                           | Chen       |                       | BA               | Washington University in St. Louis School of Medicine | St Louis, Missouri, USA                  | Imaging Analyst                                         |                                                                                            |
| Jasmin                            | Chua       |                       | BS               | Washington University in St. Louis School of Medicine | St Louis, Missouri, USA                  | Imaging Core<br>Coordinator                             |                                                                                            |
| Carlos                            | Cruchaga   |                       | PhD              | Washington University in St. Louis School of Medicine | St Louis, Missouri, USA                  | Genetics Core Co-<br>Lead                               |                                                                                            |
| Darcy                             | Denner     |                       | PhD              | Washington University in St. Louis School of Medicine | St Louis, Missouri, USA                  | Regulatory Specialist                                   |                                                                                            |
| Aylin                             | Dincer     |                       | BS               | Washington University in St. Louis School of Medicine | St Louis, Missouri, USA                  | Imaging Analyst                                         |                                                                                            |
| Tamara                            | Donahue    |                       | MS               | Washington University in St. Louis School of Medicine | St Louis, Missouri, USA                  | Site Coordinator                                        |                                                                                            |
| Anne                              | Fagan      |                       | PhD              | Washington University in St. Louis School of Medicine | St Louis, Missouri, USA                  | Fluid Biomarker Core<br>Lead                            |                                                                                            |
| Becca                             | Feldman    |                       | BS,BA            | Washington University in St. Louis School of Medicine | St Louis, Missouri, USA                  | Imaging Analyst                                         |                                                                                            |
| Shaney                            | Flores     |                       | BS               | Washington University in St. Louis School of Medicine | St Louis, Missouri, USA                  | Imaging Analyst                                         |                                                                                            |
| Erin                              | Franklin   |                       | MS               | Washington University in St. Louis School of Medicine | St Louis, Missouri, USA                  | Neuropathology Core<br>Coordinator                      |                                                                                            |

## Supplemental Online Content: Nonauthor Collaborators

\*Indicates required information. Only first name, last name, and suffix will appear in PubMed.

| *First Name and Middle Initial(s) | *Last Name      | *Suffix (eg, Jr, III) | Academic Degrees | Institution                                           | Location (city, state/province, country) | Role or Contribution, eg, chair, principal investigator | Group (if more than 1 Group listed in the byline) and/or Subgroup (eg, Steering Committee) |
|-----------------------------------|-----------------|-----------------------|------------------|-------------------------------------------------------|------------------------------------------|---------------------------------------------------------|--------------------------------------------------------------------------------------------|
| Nelly                             | Friedrichsen    |                       |                  | Washington University in St. Louis School of Medicine | St Louis, Missouri, USA                  | Imaging Core Scientist                                  |                                                                                            |
| Alyssa                            | Gonzalez        |                       | BS               | Washington University in St. Louis School of Medicine | St Louis, Missouri, USA                  | Imaging Core Coordinator                                |                                                                                            |
| Brian                             | Gordon          |                       | PhD              | Washington University in St. Louis School of Medicine | St Louis, Missouri, USA                  | Imaging Core Scientist                                  |                                                                                            |
| Julia                             | Gray            |                       | MS               | Washington University in St. Louis School of Medicine | St Louis, Missouri, USA                  | Fluid Biomarker Core Coordinator                        |                                                                                            |
| Emily                             | Gremminger      |                       | BA               | Washington University in St. Louis School of Medicine | St Louis, Missouri, USA                  | Biostats Core Project Manager                           |                                                                                            |
| Alex                              | Groves          |                       |                  | Washington University in St. Louis School of Medicine | St Louis, Missouri, USA                  | Fluid Biomarker Core Technician                         |                                                                                            |
| Jason                             | Hassenstab      |                       | PhD              | Washington University in St. Louis School of Medicine | St Louis, Missouri, USA                  | Cognition Core Lead                                     |                                                                                            |
| Cortaiga                          | Hellm           |                       | BA               | Washington University in St. Louis School of Medicine | St Louis, Missouri, USA                  | Admin Core                                              |                                                                                            |
| Elizabeth                         | Herries         |                       | BA               | Washington University in St. Louis School of Medicine | St Louis, Missouri, USA                  | Biomarker Core Scientist                                |                                                                                            |
| Laura                             | Hoechst-Swisher |                       |                  | Washington University in St. Louis School of Medicine | St Louis, Missouri, USA                  | Admin Core                                              |                                                                                            |
| David                             | Holtzman        |                       | MD               | Washington University in St. Louis School of Medicine | St Louis, Missouri, USA                  | Admin Core                                              |                                                                                            |
| Russ                              | Hornbeck        |                       | MSCS, MPM        | Washington University in St. Louis School of Medicine | St Louis, Missouri, USA                  | Imaging Core Project Management                         |                                                                                            |
| Gina                              | Jerome          |                       | MS               | Washington University in St. Louis School of Medicine | St Louis, Missouri, USA                  | Biomarker Core Scientist                                |                                                                                            |
| Celeste                           | Karch           |                       | PhD              | Washington University in St. Louis School of Medicine | St Louis, Missouri, USA                  | Admin Core                                              |                                                                                            |
| Sarah                             | Keefe           |                       | BS               | Washington University in St. Louis School of Medicine | St Louis, Missouri, USA                  | Imaging Analyst                                         |                                                                                            |
| Deb                               | Koudelis        |                       | MHS,RN           | Washington University in St. Louis School of Medicine | St Louis, Missouri, USA                  | Regulatory Specialist                                   |                                                                                            |
| Yan                               | Li              |                       | PHD              | Washington University in St. Louis School of Medicine | St Louis, Missouri, USA                  | Biostatistician                                         |                                                                                            |
| Jacob                             | Marsh           |                       | BA               | Washington University in St. Louis School of Medicine | St Louis, Missouri, USA                  | Genetics Core Scientist                                 |                                                                                            |
| Rita                              | Martinez        |                       |                  | Washington University in St. Louis School of Medicine | St Louis, Missouri, USA                  | Scientist                                               |                                                                                            |
| Kwasi                             | Mawuenyega      |                       | PhD              | Washington University in St. Louis School of Medicine | St Louis, Missouri, USA                  | Scientist                                               |                                                                                            |
| Austin                            | McCullough      |                       | PhD Candidate    | Washington University in St. Louis School of Medicine | St Louis, Missouri, USA                  | Imaging Analyst                                         |                                                                                            |
| Eric                              | McDade          |                       | DO               | Washington University in St. Louis School of Medicine | St Louis, Missouri, USA                  | Clinical Core Lead                                      |                                                                                            |
| John                              | Morris          |                       | MD               | Washington University in St. Louis School of Medicine | St Louis, Missouri, USA                  | Clinical Core Associate Lead                            |                                                                                            |

\*Indicates required information. Only first name, last name, and suffix will appear in PubMed.

| *First Name and Middle Initial(s) | *Last Name | *Suffix (eg, Jr, III) | Academic Degrees   | Institution                                           | Location (city, state/province, country) | Role or Contribution, eg, chair, principal investigator | Group (if more than 1 Group listed in the byline) and/or Subgroup (eg, Steering Committee) |
|-----------------------------------|------------|-----------------------|--------------------|-------------------------------------------------------|------------------------------------------|---------------------------------------------------------|--------------------------------------------------------------------------------------------|
| Joanne                            | Norton     |                       | MSN, RN, PMHCNS-BC | Washington University in St. Louis School of Medicine | St Louis, Missouri, USA                  | Genetics Core Coordinator                               |                                                                                            |
| Richard                           | Perrin     |                       | MD, PhD            | Washington University in St. Louis School of Medicine | St Louis, Missouri, USA                  | Neuropathology Core Lead                                |                                                                                            |
| Kristine                          | Shady      |                       | BA, BS             | Washington University in St. Louis School of Medicine | St Louis, Missouri, USA                  | Imaging Analyst                                         |                                                                                            |
| Wendy                             | Sigurdson  |                       | RN                 | Washington University in St. Louis School of Medicine | St Louis, Missouri, USA                  | Site Coordinator                                        |                                                                                            |
| Jennifer                          | Smith      |                       | PhD                | Washington University in St. Louis School of Medicine | St Louis, Missouri, USA                  | Cognition Core Coordinator                              |                                                                                            |
| Peter                             | Wang       |                       | PhD                | Washington University in St. Louis School of Medicine | St Louis, Missouri, USA                  | Biostats Core Coordinator                               |                                                                                            |
| Qing                              | Wang       |                       | PhD                | Washington University in St. Louis School of Medicine | St Louis, Missouri, USA                  | Imaging Core Scientist                                  |                                                                                            |
| Chengjie                          | Xiong      |                       | PhD                | Washington University in St. Louis School of Medicine | St Louis, Missouri, USA                  | Biostats Core Lead                                      |                                                                                            |
| Jinbin                            | Xu         |                       | PhD                | Washington University in St. Louis School of Medicine | St Louis, Missouri, USA                  | Co-Investigator                                         |                                                                                            |
| Xiong                             | Xu         |                       | BS, MS             | Washington University in St. Louis School of Medicine | St Louis, Missouri, USA                  | Biostats Core Scientist                                 |                                                                                            |
